# Supplementary material for: The use of co-design in developing physical activity interventions for older adults: a scoping review
Source: BMC Geriatr. 2022 Aug 8;22:647. doi: 10.1186/s12877-022-03345-4 (PMC9358386; doi:10.1186/s12877-022-03345-4)
Supplement: Supplementary file 5 — Additional file 5. Characteristics of included studies. [file 12877_2022_3345_MOESM5_ESM.xlsx]

## Sheet: Sheet1
First author and publication year	Aim of the Study	Country of study	Study design	Study setting	Inclusion criteria	Exclusion criteria	Sample size of co-design and intervention groups	Mean age and age range of participants	% women
Aberg (2017)	The aim of the present paper is to describe the study protocol developed and used in the initial phase of the eBalance project, including its conceptual underpinnings and its focus on user participation and co-learning.	Sweden	Qualitative research (protocol)	Community	Seniors - independence with ADLs, access to and basic knowledge of a computer. Staff - currently working in geriatric rehabilitation	NR	Co-design - 8 seniors & 4 staff	NR	NR
Arnautovska (2018)	The purpose of the current study was to explore strategies for the development and implementation of intervention programmes designed to increase PA in older adults, using a mixed-method approach. To achieve this, we aimed to investigate what specific BCTs would be most useful for facilitating PA in older adults, and second, explore the strategies for how best to design and deliver such technique…	Australia	Mixed-methods	Community	Over 65, living independently in the community, able to participate in at least moderate intensity PA.	Medical advice to refrain from PA for health reasons.	Co-design - 66 older adults	Range = 65-92; Mean = 74.2	0.576
Balbale (2014)	The purpose of this study was to evaluate the benefits of using visual and participatory research techniques toward health message development targeting older Hispanic women.	United States	Cross-sectional	Community	Phase 1 - Females over 65, self-reported Mexican origin, community dwelling, ambulatory, living in an urban Chicago neibourhood. Phase 2- 4 older women engaging in at least 150 min of moderate PA per week and 5 older women who engaged in 30 min or less of moderate PA per week.	Participations in moderate intensity PA 30-150 min/week.	Co-design - 23	Mean = 71.9	1
Bammann (2018, 2020)	The objective of the OUTDOOR ACTIVE intervention trial is to formally test and investigate efficacy of the developed short track PPM. Formally evaluate the efficacy of a CBPR approach for developing and implementing an outdoor physical activity program for older adults.	Germany	Clustered Randomized Trial Protocol (2018), Mixed-methods (2020)	Community	Non-Institutionalized adults, aged 65-75 years residing in the sample subdistricts.	Those not able to give consent.	8 sub-districts (4 control, 4 intervention) with <800 participants; final number unknown d/t protocol	Range = 65-75	NA (protocol)
Bird (2019)	The aim of this study was to determine perspectives of all stakeholders in enhancing implementation of evidence-based exercise in the community for people who have had a stroke. Specifically, the objectives were to determine the desired content and structure of an exercise program, and implementation factors including local contextualization, adoption, evaluation, sustainability, and fidelity tha…	Canada	Qualitative observational using a knowledge translation approach	Community	NA	NA	36 in focus groups. 12 individual interview. (n=11 stroke, n=3 caregivers, n=22 clinicians, n=12 community organizations)	Mean= 64 (SD-11)	NA
Brach (2016, 2017)	Co-design - We describe stakeholder involvement in the design of a clinical trial of a group-based exercise program that incorporates timing and coordination of movement into the exercises. RCT - What is the effectiveness of a timing and coordination group exercise program (On the Move) compared with a seated strength, endurance, and flexibility exercise program (usual care) for improving mobilit…	United States	Cluster Randomized, Single-Blind Intervention Trial	Community	65 years of age or older. Resident of ILF or apartment building, or member of senior community center. Ambulate independently (with or without a straight cane) for household distances. Usual gait speed of atleast 0.60 m/s	Non-English speaking. Impaired cognition (unable to follow 2-step command or understand the informed consent process). Plans to leave the area for a prolonged period over the next 4 months. Progressive neuromuscular disorder. Acute medical condition or illness that is not stable, or have an inappropriate physiologic response to the 6MWT (ie. exercise HR ≥ 120 bpm, exercise SBP ≥ 220 or a drop in …	11 (co-design) 424 (RCT)	Mean = 85	Co-Design: Male - 3/11 & Female: 8/11 Intervention: 86.2% female Control: 82.2% female
Brox (2017)	In this paper we aim to record lessons learned in 3 years of experience with exergames for seniors, considering both the needs of older adults regarding user-centered development of exergames and participation in UCD. We also provide a UCD protocol for exergames tailored to senior needs.	Not Specified but founded by European Nations	Mixed-Methods	Community Senior Center	≥ 65 years. Risk of falling or history of falling. Recent illness or surgery. Impaired strength or balance.	Cognitive impairment (MMSE score < 25). Other disease, illness, or limiting condition that would make inclusion and beneficial use of the system difficult (i.e. complete blindness, deafness, or severe disabilities)	16	Mena age of 1st group: 83; Mean age of second group: 81.7	Originally there were 16 females, and 3 males. Three of the participants had to be removed. Doesn't specify which of the sexes were removed.
Castro (2020)	Our goal was to identify requirements for designing a mobile app to encourage physical activity in a low-income community population of older people in Brazil (i.e. over 40 years old).	Brazil	Qualitative Research	Community	Aged between 40 and 90 years; comprehension and verbal communication skills; agree to participate in the research, with the signature of the Informed Consent; and participant be registered in the local Family Health Strategy.	living outside the indicated context (region).	17 participants total, 12 active, and 5 non active.	Range=44-88 Mean= 63	Female- 12 (70.5%) Male-5 (29.4%)
DaSilvaJunior (2021)	This study has 3 objectives. First, we intended to co-design and develop a new exergame alongside older participants to tailor the game mechanics and optimize their adherence and enjoyment for exercise. Thereafter, we tested the participants’ functional capacity, motivation, and adherence to the exergaming program and compared these scores between those who played alone and those who played with …	Brazil	Mixed-Methods	Community	participants who reported practicing some type of physical activity at least once a week before this study and who agreed to pause it during the testing period. All participants also had to have prior knowledge about the use of any type of technology (i.e. smartphones, computers,or video games). Men and women older than 60 years were accepted if they had cognitive aptitude attested by the Mini-Me…	we excluded participants who reported having been discouraged by a physician to practice physical activity, had been hospitalized in the past 20 days, or would not have been able to attend all gaming sessions.	19	Total mean age - 68.9 (SD 5.3 years); peers group mean age - 68.8 (SD 5.2 years) ; alone group mean age - 69.1 (SD 5.8 years)	Female - 13 (68.4%) Male - 6 (31.5%)
Davies (2008)	The aim was to initiate a process for positive change, rather than impose a ‘ready made’ project. This was achieved by recruiting ‘local researchers’ employed by the University who did not necessarily have formal qualifi cations but who were either resident in or had close connections with the community. Triangle Ystradgynlais began, in 2001, in partnership work with the NPHS Local Health Promoti…	UK	Mixed-Methods	Community	≥50 years	NA	First class in January 2001- 63, average weekly attendance was 36. At the time of the second evaluation event four years later, the group was entirely female with 44 regular attendees and 14 who had attended irregularly for some time.	73% were >60 years old and 18% were >70 years old	Female - 40 (90.9%) Male - 4 (9.1%)
Frigault (2020)	The lack of information related to Inuvialuit Elders in current Cana-dian falls prevention research inspired us to conduct research with Inuvialuit Elders and local falls prevention programmers (LFPPs) in Inuvik. Working with the par-ticipants, we sought to address the following questions: “What are the current falls prevention recommendations (from research participants) to decrease fall rates a…	Canada	Qualitative Research	Community	≥ 55 years. Individuals who were at higher risk of experiencing falls. Local falls prevention programmers (LFPP) participants be knowledgeable in falls prevention literature and have training and/or certificates in falls prevention (e.g., Canadian Falls Pre-vention Curriculum). Had to have worked in falls prevention for at least one year to ensure that they were familiar with the area.	NA	Inuvialuit Elders: n=8 LFPP participants: n=6	Inuvialuit Elders: range from 64-79	Inuvialuit Elders: Male; n=4 (50%) & Female; n=4 (50%). LFPP participants: Male; n=1 (16.7%) & Female; n=5 (83.3%)
Gine-Garriga (2020)	Primary aim: to assess the feasibility, acceptability, and safety of an intervention to reduce SB and enhance PA, which was previously co-created with care home residents, staff, family members, and policy makers. Secondary aim: to assess the preliminary effects of the intervention to reduce SB and improve health-related outcomes.	Spain and Scotland	Pilot two-armed pragmatic cluster randomized clinical trial	LTC/Retirement Home	NA	Residents with an end-stage disease, and/or with severe dementia	31	GR: 83.2 (SD: 9.1) and CG: 82.7 (SD: 13.2)	Total: 51.6% female, 48.4% male; CG: 66.7% women; GR: 45.5% women
Gine-Garriga (2018, 2019)	Protocol: The GET READY project aims to integrate service-learning methodology into Physical Therapy and Sport Sciences University degrees by offering students individual service opportunities with residential care homes22, in order to co-create the best suited intervention to reduce the SB of residents, with researchers, older adults of both genders (end-users) in care homes, health professional…	Spain and Scotland	Mixed-Methods/Qualitative Research	LTC/Retirement Home	≥ 70 years and willing to participate.	comorbidity preventing participation (e.g. severe breathlessness, pain, or severe neurological disease), severe cognitive impairment, life expectancy of less than one year, being unable to rise out of a chair with help of one person, or being unlikely to undertake the intervention.	22 residents	Protocol: age 70+ Study: Glasgow: mean = 83, range = 71-105 Barcelona: mean = 83.4, range = 72-100 Total: mean = 83.2, range = 71-105	residents female: 13 (59%) male: 9 (41%) 50% women in Glasgow, 70% women in Barcelona
Jitramontree (2015)	This study aimed to develop the Multifactorial, Age-friendly Fall Prevention Program in collaboration with community participants and based on their needs and desires to prevent falls in older people.	Thailand	Qualitative Research	Community	Thai older persons ≥60 and able to take care of their own daily living activities were recruited. Family members living in the same home as these participants were also invited to join the study	NA	80	≥60	Not described
Kittipimpanon (2012)	Since community participation has been shown to provide the means for development of suitable fall prevention programs that lead to sustainable behavioral changes that reduce falls and fall-related injuries, the aim of this study was to develop and evaluate the effectiveness of a “Community-based Fall Prevention Program for Elderly Thais” living in urban Bangkok.	Thailand	Mixed-Methods	Community	≥60 years of age; living in the selected study site community; being able to verbally communicate in Thai; being willing to participate; and, demonstrating adequate cognitive function	NA	Co-design n=41; intervention n=28	Total: 62 to 86 years (mean=72.93) Intervention: mean=72.93 years (range= 63 to 86 years)	n=31(75.6%) of them were women Intervention- Female (n=22; 78.6%)
Lacey (2000)	This paper describes the design and evaluation of an innovative smart mobility aid for the frail visually impaired. The Personal Adaptive Mobility AID (PAM-AID)project began in 1994 with the aim of developing a mobility aid to specifically address the needs of the frail blind.	Ireland	Qualitative Research	LTC/Retirement Home	NA	NA	Active demonstrator: 16 Active final: 5 Passive field trial: 7 Additional passive trial: 12 Prototype: 8	Active: Range= 67-95; Mean=82 Passive: average=79	NA
Leask (2019)	The aim of this study was to utilise co-creation with ageing and older adults to develop recommendations for redesigning and promoting local leisure services with an emphasis on MBSBA.	UK	Qualitative Research	Community	aged within the pre-defined parameters, community-dwelling, able to give informed consent and able to attend a minimum of nine workshops.	NA	24	1 group range=50-65; other aged 65+	female: n=14 (58%), male: n=10 (42%)
Leask (2017)	The aim of this study was to document and evaluate the co-creation of a public health intervention to reduce sedentary behaviour in older adults.	UK	Participatory and Appreciative action and reflection methodology was used	Community	65+ years of age, community-dwelling, able to ambulate independently, able to give informed consent and able to attend a minimum of five workshops.	NA	11 community-dwelling older adults & 4 university researchers	Mean: 74 Range: 66-82	Male: 45.5% Female: 54.5%
Lu (2017)	This paper aims to derive the right questions to be addressed further in the co-creation process to support technology adoption for older adults. This paper analyses to what extent the early ideation process of the co-creation process in multi-stake-holder innovation can support technology adoption of older adults to promote physical activities.	European countries (n=4, not specified)	Qualitative Research and Case Study	Community	>65 years old	NR	NR	NA	NA
Mansson (2020)	The aim of this co-creation study was to, according to the Optimized Honeycomb model for user experience, describe the older adult participants’ preferences for, and their contribution to, the design of the instructions and user interface of a smartphone self-test for balance and leg strength. By using co-creation, we expect that the UX could be reinforced and also give an opportunity for user-te…	Sweden	Qualitative Research (Qualitative Co-Creation Study)	Community	in the previous study had openly shared their opinions, this to obtain candid suggestions during the design process. Some previous experience of using either a computer, tablet, or smartphone was also required.	NA	10	>70 (mean age 76 +/- 3 years)	Male: 40% Female: 60%
Parker (2012)	The current study sought to effectively implement the ASHP in three senior centers serving predominantly African American, Hispanic, and non-Hispanic white older adults through a collaborative adaptation process. Adapting the program to maximize its utility for older African American and Hispanic populations is appropriate because of established disparities in the management of pain as a function…	United States	Qualitative Research	Community	60 years of age or older, have self-identified arthritis-related disorder, and be verbally fluent in Spanish or English	NR	112	75 (mean age)	Women: 83%, Men: 17%
Pearson (2016)	The objective of this study was to codesign a Web-based version of ESCAPE-pain that people with chronic joint pain find engaging, informative, and useful.	United Kingdom	Mixed-methods	Community	≥ 50 years with chronic (> 6 months duration) knee, hip and/or back pain who had participated in previously conducted ESCAPE-pain program.	NR	Survey participants = 83, Focus groups total = 24	67 (mean age), age range 53 - 84 years old	Women: 67%, Men: 33%
Revenas (2020)	The aim of this study was to describe a protocol for systematic analysis and prioritization of feedback from user subgroups in the usability testing of a digital motivation support for fall-preventive physical activity (PA) interventions in seniors (aged 65 years and older). This protocol can help researchers and developers to systematically exploit feedback from relevantuser subgroups in User Ce…	Sweden	Protocol of Qualitative Research	Community	≥ 65 years old.	NR	NR	NA	NA
Seino (2018)	The aims of this study are to develop and examine the effectiveness of a social mechanism (ie, intervention content) that postpones frailty and to determine the requirements for transferring the intervention to other communities (transferability). Using this process, we aim to develop a prototype of a frailty prevention strategy for metropolitan areas in Japan. This report describes the study des…	Japan	Baseline Survey	Community	≥ 65 years old living in Ota City, Tokyo, Japan	NR	Survey participants = 11, 925, Surveys included in analysis = 11,701	intervention group age 65-74 = 47.4%, age 75-84 = 52.6%, control group: age 65-74: 46.9%, age 75-84 = 53.1%, mean intervention: 74.3 (SD 5.4), mean control: 74.3 (SD 5.5)	Intervention group: Women: 51.7%, Male: 48.3%; Control group: Women: 51.4%, Men: 48.6%
Swallow (2016)	Building on a previous study that involved older adults in the requirements elicitation process, the current study explores the effectiveness of involving older adults in the development of mobile application design concepts to support their mobility and wellbeing in the built environment secondary aim: A secondary aim of this study was to explore the degree of design fidelity necessary to encour…	United Kingdom	Case Study and Participatory Design	Community	Participants were recruited on the basis that they were willing to discuss mobility problems and explore how technology, such as mobile phones and tablet devices, may be used to support people to get out and about in their local area. No previous experience with mobile phones or tablet devices was necessary.	NR	n = 33	Age range 55 to 85 years old	Sex: Male; n=16, 48.4%, Female; n=17, 51.5%
Szanton (2016)	This study conducted a pilot to assess safety, acceptability, and feasibility of a Wii-based exergame designed to increase disabled older adults’ strength and balance.	United States	Mixed-methods	Community	At least 65 years old; intact cognitive function based on the Short portable mental status questionnaire; difficulty with at least one activities of daily living limitation (such as bathing or dressing); low income (household income ≤ 199% of the Federal Poverty Level); able to stand with or without assistance; and score less than 9 on the Short Physical Performance Battery	Individuals were excluded for having more than three hospitalizations in the previous year, in-home rehabilitation (nursing, physical therapy or occupational therapy), a terminal diagnosis with less than 1 year expected survival, active cancer treatment, plans to move in less than 1 year, or an inability to provide informed consent.	n=21	Mean: 73.60 (no age range provided)	Sex: Male; n=5, 24% , Female; n=16, 76%
Tabak (2020)	In this article, we describe the design approach of a game-based, mobile coaching application for older adults (65–75 years) that aimed to stimulate physical activity (PA) in daily life. We evaluated older adults’ experiences using this application compared with a standard coaching application in terms of engagement, motivation to be physically active, and in relation to the applied design featur…	Netherlands	Mixed-methods	Community	65–75 years old upon inclusion and no health-related complaints that limit the performance of physical activities in daily life (able to comply with step goal) as determined by their physical therapist.	NR	n=20	Age range: 65-75, mean 71.0 +/-5 yrs	Male: 50%, Female: 50%
Timmerman (2016)	The primary objective of this study was 1) to develop a multimodal telehealthcare application that aimed at improving post-surgery rehabilitation and physical activity, in close cooperation with resected NSCLC survivors and their healthcare professionals (HCPs), and 2) to evaluate its usability.	Netherlands	Mixed-methods	Community	Included patients were 18 years or older, treated with lung resection within the previous two years (with or without adjuvant treatment), and had no recurrence of cancer at enrolment.	NR	Patients = 10, Health Care Providers (HCPs) = 6	mean age ± sd = 62 ± 11 years	Patients: F=70%, M=30% HCPs: F=50%, M=50%
Verhoeven (2016)	Existing solutions facilitating mobility among older adults mainly focus on supporting physical disabilities. However, solutions are more likely to succeed when current activities and capabilities serve as a starting point. Participatory design is a suitable approach to detect these. We investigated (i) how participatory design techniques can be applied to obtain insight into the daily activities…	Netherlands and Spain	Mixed-Methods	Community	The target group of our project was older adults over the age of 60, living independently at home, with possible mild physical and/or cognitive mobility limitations	NR	Phase 1: a. Session 1 - 2 groups (n=15, n=6) b. In-between activity cultural probes (n=7) c. Session 2 - one on one interviews (n=7) d. Session 3 - one to one interviewing (n=2) e. online questionairre about daily activity (n= 13) Phase 3: - 4 males and 8 women Phase 4: - 3 females and 6 males	Phase 1 - Netherlands 58-93 and Spain 65+ Phase 3 - ages range from 49 to 93 (mean of 68.5) Phase 4 - Netherlands range from 60-70 (mean approx. 65) and Spain ranges from 60-80	Phase 3 Male; N=4, Female; N=8 Phase 4 Netherlands Male; N=6, Female; N=3 Spain Male; N=2, Female; N=2
Walsh (2019)	This paper provides a comprehensive description of the PATHway intervention development process, its final structure, and content. It describes the steps undertaken to develop a user-centered, dynamic, adaptive, eHealth intervention, and the research team have endeavored to present each development step to facilitate replication of this design process for future complex eHealth interventions. PAT…	Ireland and Belgium	Mixed-Methods	Community and Hospital-based	Individuals with CVD were selected based on a variety of cardiac histories (e.g., PCI, stenting, CABG, and heart failure) and differ-ing levels of engagement with CR services: (a) high attenders of hospital-based CR, (b) low attenders of hospital-based CR, (c) high attenders of commu-nity-based CR, and (d) dropouts from communi-ty-based CR. Eligible CVD patients were identified by the research te…	NR	Survey: n = 310; 77% male; mean age 61.7 ± 14.5 years, Interviews: 33 one-to-one interviews were conducted with CVD patients (male n = 26; female n = 7; mean age = 60.38 years). 21 interviews were con-ducted with healthcare professional stakeholders (n=21). Focus groups: n= 30 (18 male, 12 female; age 55–75 years, range of CVD history)	Survey: mean age 61.7 ± 14.5 years, Interviews patients: mean age 60.38 years. Interviews HCPs: NR . Focus groups: age 55–75 years	Survey: Male: 77%, Female: 23%; Interviews: Male: 79%, Female: 21% . Interviews HCPs: NR. Focus groups: Male: 60%, Female: 40%
